# Supplementary material for: Zn(ii) detection and biological activity of a macrocycle containing a bis(oxadiazole)pyridine derivative as fluorophore
Source: Royal Society of Chemistry journal article supplement (doi:10.1039/c9dt03910d), 2020-01-01
Supplement: c9dt03910d1.pdf [file c9dt03910d1.pdf]

## Zn(II) Detection and Biological Activity of a Macrocycle Containing a Bis(oxadiazole)pyridine Derivative as Fluorophore

Gianluca Ambrosi,<sup>a</sup> Mirco Fanelli,<sup>b</sup> Paola Paoli,<sup>c</sup> Mauro Formica,<sup>a</sup> Daniele Paderni,<sup>a</sup> Patrizia Rossi,<sup>c</sup> Mauro Micheloni,<sup>a</sup> Luca Giorgi,<sup>a\*</sup>Vieri Fusi<sup>a\*</sup>

<sup>a</sup>Department of Pure and Applied Sciences, University of Urbino, Via della Stazione 4, I-61029 Urbino, Italy.

Tel/Fax: +39-0722-304884. Email: [luca.giorgi@uniurb.it](mailto:luca.giorgi@uniurb.it)

<sup>b</sup>Molecular Pathology Laboratory "PaoLa", Department of Biomolecular Sciences, University of Urbino, Via Arco d'Augusto 2 61032, Fano (PU), Italy

<sup>c</sup>Department of Industrial Engineering, University of Florence, via Santa Marta 3, I-50136 Florence, Italy.

### Table of Contents

**Table S1.** Angle between the mean planes 1,2,3,4 and 5. For the B molecules, due to disorder, two value (For Ba and Bb respectively) are reported for the angles involving the plane number 5.

**Table S2.** Protonation constants ( $\log K$ ) of ligand **L** spectrofluorimetrically determined in 0.15 mol dm<sup>-3</sup> NaClO<sub>4</sub> water/acetonitrile 70/30 v/v solvent mixture at 298.1 K.

**Figure S1.** Superimposition of the a (green) and b (pale blue) model of the B independent molecules of **L**.

**Figure S2.** Left = ball and stick representation of the A molecule in **L**. Right = ball and stick representation of SEQRIR.

**Figure S3.** Absorption spectra of **L** recorded in water/acetonitrile 70/30 v/v in the presence of a HEPES buffer (10<sup>-3</sup> mol dm<sup>-3</sup>) at pH = 7.0 and after addition of 2 equivalents of a) Ni(ClO<sub>4</sub>)<sub>2</sub>, b) Cu(ClO<sub>4</sub>)<sub>2</sub>, c) Zn(ClO<sub>4</sub>)<sub>2</sub> and d) Cd(ClO<sub>4</sub>)<sub>2</sub>. ([**L**] = 2 · 10<sup>-5</sup> mol dm<sup>-3</sup>).

**Figure S4.** Variation of the emission intensity at 360 nm as a function of the added Zn(II) registered in water/acetonitrile 70/30 v/v in the presence of a HEPES buffer (10<sup>-3</sup> mol dm<sup>-3</sup>) at pH = 7.0 ( $\lambda_{\text{ex}}$  = 300 nm, [**L**] = 2 · 10<sup>-5</sup> mol dm<sup>-3</sup>).

**Figure S5.** <sup>1</sup>H-NMR spectra of **L** recorded in acetonitrile-*d*<sub>3</sub> with step-to-step addition of Zn(II) ion as perchlorate salt. ([**L**] = 1 · 10<sup>-2</sup> mol dm<sup>-3</sup>, [Zn(II)] = 5 · 10<sup>-2</sup> mol dm<sup>-3</sup>, 298 K)

|   |   | 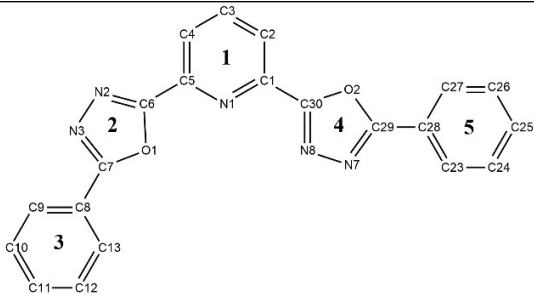 |         |         |                 |
|---|---|------------------------------------------------------------------------------------|---------|---------|-----------------|
|   |   | 2                                                                                  | 3       | 4       | 5               |
| A | 1 | 4.4(1)                                                                             | 12.3(1) | 22.6(2) | 68.6(2)         |
|   | 2 |                                                                                    | 8.7(2)  | 25.4(2) | 72.7(2)         |
|   | 3 |                                                                                    |         | 26.6(2) | 76.2(2)         |
|   | 4 |                                                                                    |         |         | 50.0(2)         |
| B | 1 | 7.9(2)                                                                             | 12.7(2) | 17.0(2) | 64.3(4)/61.7(4) |
|   | 2 |                                                                                    | 5.5(2)  | 20.5(2) | 71.3(4)/54.9(4) |
|   | 3 |                                                                                    |         | 21.3(2) | 73.7(4)/52.9(3) |
|   | 4 |                                                                                    |         |         | 53.2(4)/74.1(3) |

**Table S1.** Angle between the mean planes 1,2,3,4 and 5. For the B molecules, due to disorder, two value (For Ba and Bb respectively) are reported for the angles involving the plane number 5.

**Table S2.** Protonation constants ( $\log K$ ) of ligand **L** spectrofluorimetrically determined in 0.15 mol dm<sup>-3</sup> NaClO<sub>4</sub> water/acetonitrile 70/30 v/v solvent mixture at 298.1 K.

| Reaction                                                                   | Log $K$             |
|----------------------------------------------------------------------------|---------------------|
| $\mathbf{L} + \mathbf{H}^+ = \mathbf{HL}^+$                                | 6.9(1) <sup>a</sup> |
| $\mathbf{HL}^+ + \mathbf{H}^+ = \mathbf{H}_2\mathbf{L}^{2+}$               | 4.8(2)              |
| $\mathbf{H}_2\mathbf{L}^{2+} + \mathbf{H}^+ = \mathbf{H}_3\mathbf{L}^{3+}$ | 2.2(1)              |

<sup>a</sup>Values in parentheses are the standard deviations on the last significant figure.

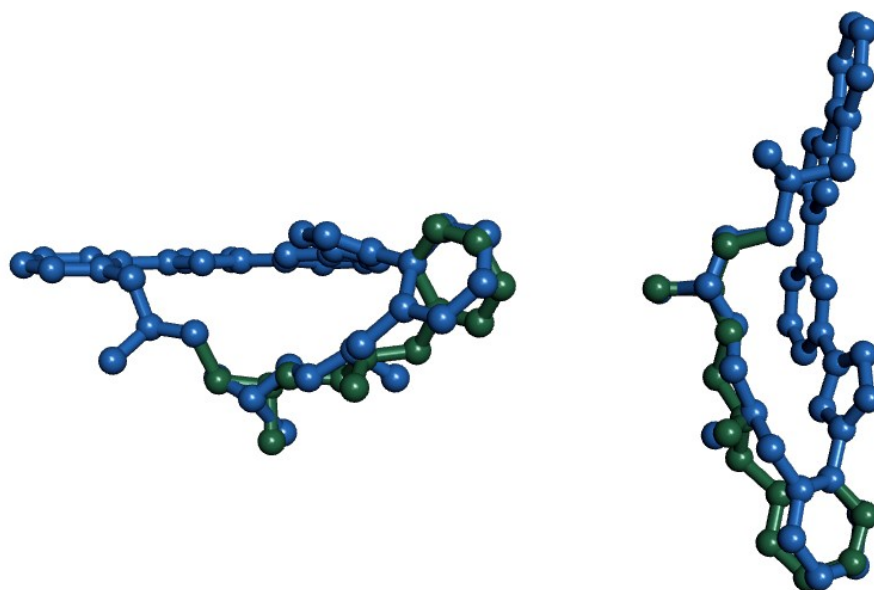

**Figure S1.** Superimposition of the a (green) and b (pale blue) model of the B independent molecules of **L**.

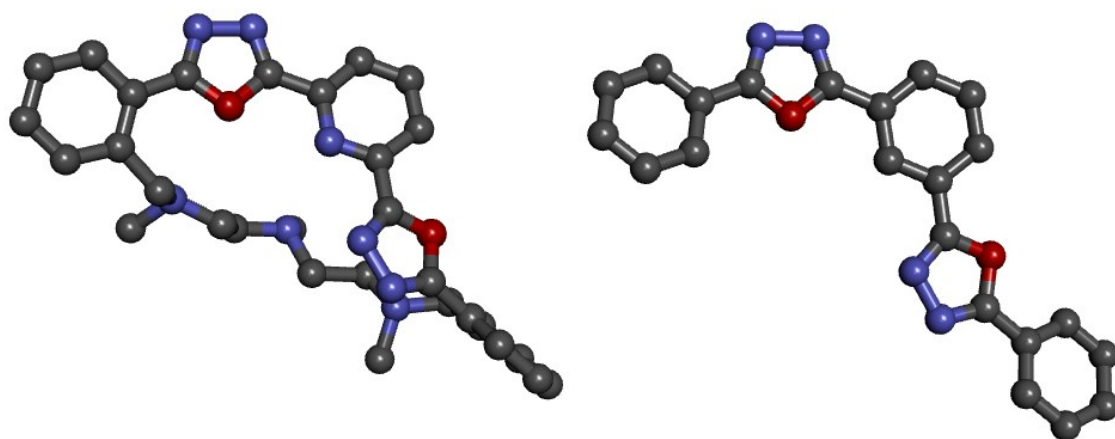

**Figure S2.** Left = ball and stick representation of the A molecule in L. Right = ball and stick representation of SEQRIR.

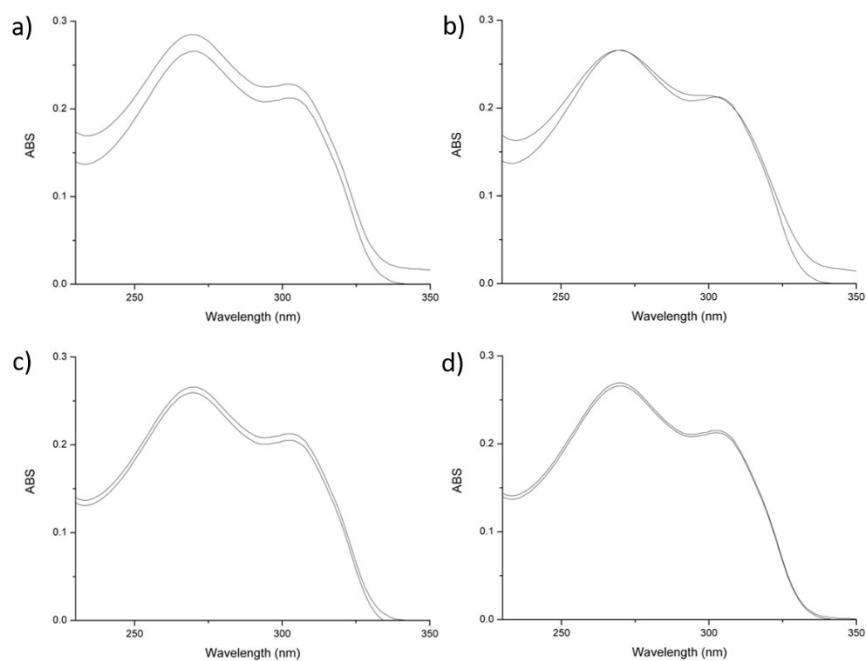

**Figure S3.** Absorption spectra of **L** recorded in water/acetonitrile 70/30 v/v in the presence of a HEPES buffer ( $10^{-3}$  mol dm $^{-3}$ ) at pH = 7.0 and after addition of 2 equivalents of a) Ni(ClO $_4$ ) $_2$ , b) Cu(ClO $_4$ ) $_2$ , c) Zn(ClO $_4$ ) $_2$  and d) Cd(ClO $_4$ ) $_2$ . ( $[L] = 2 \cdot 10^{-5}$  mol dm $^{-3}$ ).

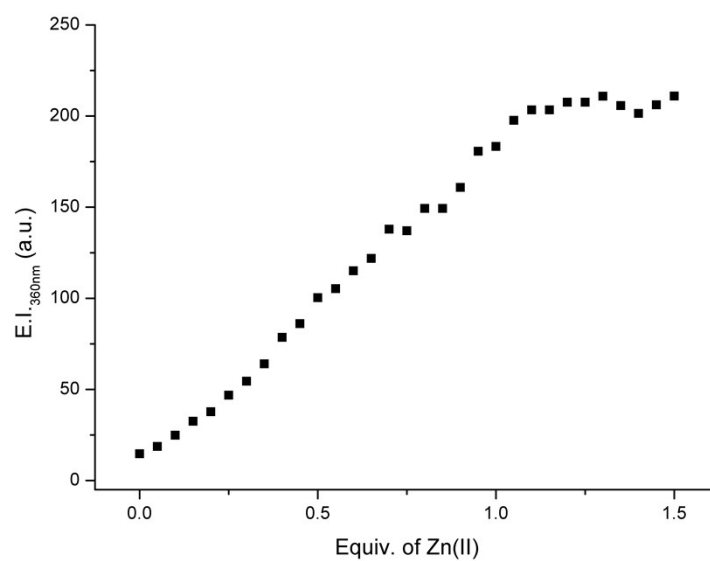

**Figure S4.** Variation of the emission intensity at 360 nm as a function of the added Zn(II) registered in water/acetonitrile 70/30 v/v in the presence of a HEPES buffer ( $10^{-3}$  mol dm $^{-3}$ ) at pH = 7.0 ( $\lambda_{\text{ex}}$  = 300 nm,  $[L] = 2 \cdot 10^{-5}$  mol dm $^{-3}$ ).

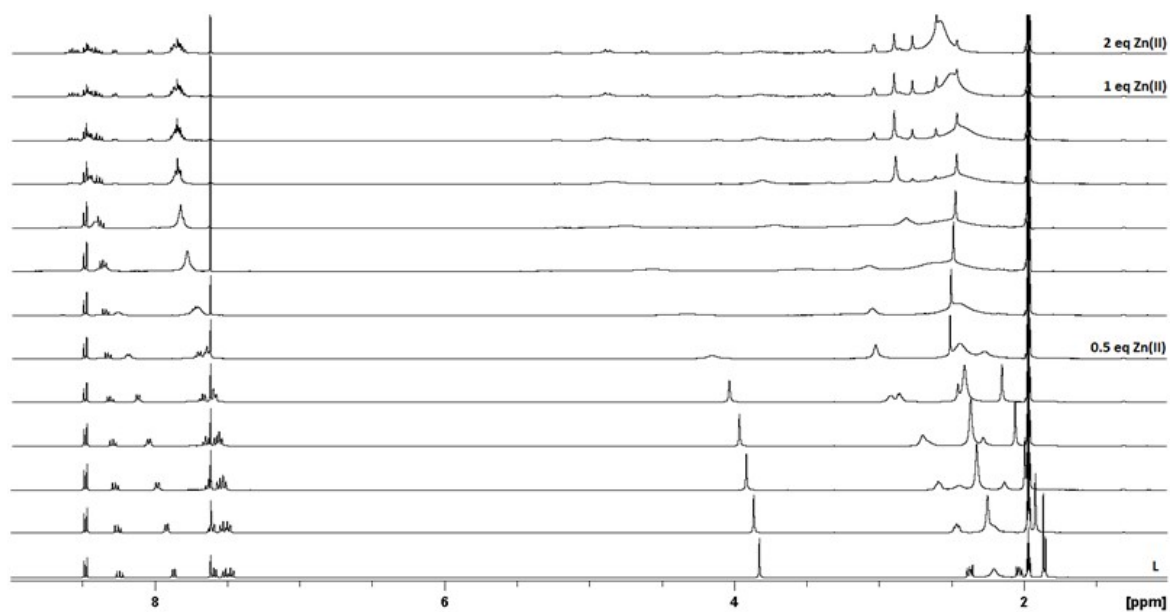

**Figure S5.** <sup>1</sup>H-NMR spectra of **L** recorded in acetonitrile-*d*<sub>3</sub> with step-to-step addition of Zn(II) ion as perchlorate salt. ( $[L] = 1 \cdot 10^{-2} \text{ mol dm}^{-3}$ ,  $[Zn(II)] = 5 \cdot 10^{-2} \text{ mol dm}^{-3}$ , 298 K)
